# Supplementary material
Source: PubMed Central journal article supplement (PMC3888241)
Supplement: NIHMS533169-supplement-Supplementary_Material.pdf [file NIHMS533169-supplement-Supplementary_Material.pdf]

Supplementary Materials for

# Early Termination of a Two-Stage Study to Develop and Validate a Panel of Biomarkers

Joseph S. Koopmeiners<sup>1,†</sup> and Rachel Isaksson Vogel<sup>2</sup>

<sup>1</sup>Division of Biostatistics, University of Minnesota, Minneapolis, Minnesota

<sup>2</sup>Biostatistics and Bioinformatics Core, Masonic Cancer Center, University of Minnesota, Minneapolis, Minnesota

<sup>†</sup>*Corresponding author's address: koopm007@umn.edu*

## 1 Setting the Simulation Parameters

Let  $X$  be a 15 dimensional vector of biomarkers, which is composed of  $n_s$  signal markers,  $X_s$ , (i.e. biomarkers that are truly associated with PC recurrence) and  $15 - n_s$  noisy markers,  $X_n$  (i.e. biomarkers that are not associated with PC recurrence). That is,  $X$  is composed of two sub-vectors,

$$X = (X_s, X_n),$$

where  $X_s$  is a  $n_s$  dimensional sub-vector of signal markers and  $X_n$  is a  $(15 - n_s)$  dimensional sub-vector of noisy markers. The signal markers and noisy markers are randomly sampled from multivariate normal distributions,  $X_s \sim N(0, \Sigma_s)$  and  $X_n \sim N(0, I)$ , respectively. Biochemical failure times,  $Y$ , are randomly sampled from an exponential distribution with rate parameter,  $\lambda$ , where  $\lambda$  is a function of  $X_s$ ,

$$\log \lambda = \beta_0 + X_s^t \beta_{1,s},$$

with  $\beta_{1,s} = \beta_s W_s$ , where  $\beta_s$  is a scalar and  $W_s$  is a vector of weights indicating the relative importance of each marker.

The following parameters must be specified:  $n_s$ ,  $W_s$ ,  $\Sigma_s$ ,  $\beta_0$  and  $\beta_{1,s}$ . We varied  $n_s$ ,  $W_s$  and  $\Sigma_s$  to determine their effect on the operating characteristics of our study and we set  $\beta_0$  and  $\beta_1$  by solving a system of equations to achieve the desired prevalence and true value of  $ROC(0.1)$  (either  $ROC(0.1)_0$  or  $ROC(0.1)_1$ ). We note that the following equations only consider the signal markers as the recurrence times are not associated with the noisy markers. Our desired prevalence, a 5-year PC recurrence rate of 0.15, defines the following equation,

$$0.15 = P(Y \leq 5) = \int_{-\infty}^5 \int_{x_s \in \mathfrak{R}^{n_s}} f(y|x_s, \beta_0, \beta_{1,s}) f(x_s|\Sigma_s) dx_s dy, \quad (1)$$

and the desired true value for  $ROC(0.1)$  defines the following equations for the specificity (equal to 0.90),

$$0.90 = P(X_s^t \beta_{1,s} \leq c | Y > 5) = \frac{\int_5^\infty \int_{x_s^t \beta_{1,s} \leq c} f(y|x_s, \beta_0, \beta_{1,s}) f(x_s|\Sigma_s) dx_s dy}{\int_5^\infty \int_{x_s \in \mathfrak{R}^{n_s}} f(y|x_s, \beta_0, \beta_{1,s}) f(x_s|\Sigma_s) dx_s dy}, \quad (2)$$

and the sensitivity (equal to  $ROC(0.1)$ ),

$$ROC(0.1) = P(X_s^t \beta_{1,s} > c | Y \leq 5) = \frac{\int_{-\infty}^5 \int_{x_s^t \beta_{1,s} > c} f(y|x_s, \beta_0, \beta_{1,s}) f(x_s|\Sigma_s) dx_s dy}{\int_{-\infty}^5 \int_{x_s \in \mathfrak{R}^{n_s}} f(y|x_s, \beta_0, \beta_{1,s}) f(x_s|\Sigma_s) dx_s dy}. \quad (3)$$

We note that Equations 2 and 3 introduce a third parameter,  $c$ , leaving us with three equations and three unknowns. These equations can be simplified by defining,

$$Z = X_s^t \beta_{1,s},$$

where  $Z \sim N(0, \beta_{1,s}^t \Sigma_s \beta_{1,s})$ , and noting that,

$$\int_0^5 f(y|x_s, \beta_0, \beta_{1,s}) dy = 1 - e^{-5e^{\beta_0 + z}}.$$

This allows us to redefine Equations 1, 2 and 3 as

$$0.15 = P(Y \leq 5) = \int_{-\infty}^{\infty} \left(1 - e^{-5e^{\beta_0+z}}\right) f(z|\beta_{1,s}, \Sigma_s) dz, \quad (4)$$

$$0.90 = P(X_s^t \beta_{1,s} \leq c | Y > 5) = \frac{\int_{-\infty}^c e^{-5e^{\beta_0+z}} f(z|\beta_{1,s}, \Sigma_s) dz}{\int_{-\infty}^{\infty} e^{-5e^{\beta_0+z}} f(z|\beta_{1,s}, \Sigma_s) dz}, \quad (5)$$

and,

$$ROC(0.1) = P(X_s^t \beta_{1,s} > c | Y \leq 5) = \frac{\int_c^{\infty} \left(1 - e^{-5e^{\beta_0+z}}\right) f(z|\beta_{1,s}, \Sigma_s) dz}{\int_{-\infty}^{\infty} \left(1 - e^{-5e^{\beta_0+z}}\right) f(z|\beta_{1,s}, \Sigma_s) dz}. \quad (6)$$

Solving Equations 4, 5 and 6 provides the correct values of  $\beta_0$  and  $\beta_1$  for simulating with the desired prevalence and true value of  $ROC(0.1)$ .

## 2 Additional Simulation Results

Tables 1, 2 and 3 presents simulation results evaluating the impact of marker parameters  $n_s$ ,  $W_s$ ,  $V_s$  and  $\rho$  on the operating characteristics of our study when two, three and four stopping times are included in stage 2, respectively. The results are similar to what was observed for the design with only one, final analysis at the conclusion of stage. We see that increasing the number of signal markers,  $n_s$ , results in in a slight increase in the expected sample size under the null and a decrease in the power, while increasing the correlation between signal markers,  $\rho$ , results in a decreased expected sample size under the null and an increase in power. Overall, though, we see that the operating characteristics of our study are reasonably robust to varying the underlying marker distribution and that differences due to varying the marker parameters are small compared to differences due to varying the design parameters.

Table 1: Simulation results evaluating the impact of marker parameters  $n_s$ ,  $W_s$ ,  $V_s$  and  $\rho$  on the operating characteristics of our study when two stopping times are included in stage 2. Simulations were completed using  $P = 0.3$  and  $ROC(0.1)_{co} = 0.45$ . 10000 simulations were completed for each scenario.

|                                                                                                                                                            | $n_s = 3$                    |              |                             |                 | $n_s = 5$                    |              |                             |                 | $n_s = 7$                    |              |                             |                 |
|------------------------------------------------------------------------------------------------------------------------------------------------------------|------------------------------|--------------|-----------------------------|-----------------|------------------------------|--------------|-----------------------------|-----------------|------------------------------|--------------|-----------------------------|-----------------|
|                                                                                                                                                            | Null hypothesis <sup>1</sup> |              | Alt hypothesis <sup>2</sup> |                 | Null hypothesis <sup>1</sup> |              | Alt hypothesis <sup>2</sup> |                 | Null hypothesis <sup>1</sup> |              | Alt hypothesis <sup>2</sup> |                 |
|                                                                                                                                                            | E(SS)                        | Unc $\alpha$ | E(SS)                       | Unc $1 - \beta$ | E(SS)                        | Unc $\alpha$ | E(SS)                       | Unc $1 - \beta$ | E(SS)                        | Unc $\alpha$ | E(SS)                       | Unc $1 - \beta$ |
| $W_s = (1, \dots, 1), V_s = (1, \dots, 1)$                                                                                                                 |                              |              |                             |                 |                              |              |                             |                 |                              |              |                             |                 |
| $\rho = 0.0$                                                                                                                                               | 323                          | 0.003        | 604                         | 0.909           | 325                          | 0.002        | 609                         | 0.887           | 325                          | 0.002        | 614                         | 0.867           |
| $\rho = 0.2$                                                                                                                                               | 317                          | 0.004        | 602                         | 0.902           | 322                          | 0.002        | 609                         | 0.898           | 325                          | 0.002        | 614                         | 0.879           |
| $\rho = 0.4$                                                                                                                                               | 320                          | 0.003        | 599                         | 0.912           | 320                          | 0.002        | 606                         | 0.893           | 319                          | 0.002        | 610                         | 0.887           |
| $\rho = 0.6$                                                                                                                                               | 315                          | 0.003        | 599                         | 0.903           | 319                          | 0.002        | 606                         | 0.899           | 319                          | 0.003        | 607                         | 0.892           |
| $W_s = (1, \dots, 1), V_s = \left(\frac{n_s}{n_s}, \frac{n_s-1}{n_s}, \dots, \frac{1}{n_s}\right)$                                                         |                              |              |                             |                 |                              |              |                             |                 |                              |              |                             |                 |
| $\rho = 0.0$                                                                                                                                               | 323                          | 0.003        | 604                         | 0.903           | 326                          | 0.003        | 613                         | 0.885           | 325                          | 0.001        | 617                         | 0.869           |
| $\rho = 0.2$                                                                                                                                               | 319                          | 0.004        | 603                         | 0.903           | 320                          | 0.002        | 608                         | 0.890           | 323                          | 0.002        | 614                         | 0.876           |
| $\rho = 0.4$                                                                                                                                               | 320                          | 0.003        | 601                         | 0.904           | 320                          | 0.002        | 606                         | 0.897           | 321                          | 0.002        | 612                         | 0.875           |
| $\rho = 0.6$                                                                                                                                               | 319                          | 0.004        | 600                         | 0.905           | 320                          | 0.004        | 608                         | 0.894           | 321                          | 0.002        | 613                         | 0.883           |
| $W_s = \left(\frac{n_s}{n_s}, \frac{n_s-1}{n_s}, \dots, \frac{1}{n_s}\right), V_s = (1, \dots, 1)$                                                         |                              |              |                             |                 |                              |              |                             |                 |                              |              |                             |                 |
| $\rho = 0.0$                                                                                                                                               | 322                          | 0.003        | 604                         | 0.895           | 323                          | 0.002        | 611                         | 0.884           | 321                          | 0.002        | 613                         | 0.874           |
| $\rho = 0.2$                                                                                                                                               | 319                          | 0.003        | 604                         | 0.904           | 320                          | 0.003        | 608                         | 0.898           | 325                          | 0.003        | 612                         | 0.887           |
| $\rho = 0.4$                                                                                                                                               | 320                          | 0.003        | 601                         | 0.911           | 320                          | 0.002        | 604                         | 0.895           | 319                          | 0.002        | 609                         | 0.892           |
| $\rho = 0.6$                                                                                                                                               | 316                          | 0.004        | 599                         | 0.905           | 318                          | 0.002        | 606                         | 0.906           | 321                          | 0.003        | 608                         | 0.895           |
| $W_s = \left(\frac{n_s}{n_s}, \frac{n_s-1}{n_s}, \dots, \frac{1}{n_s}\right), V_s = \left(\frac{n_s}{n_s}, \frac{n_s-1}{n_s}, \dots, \frac{1}{n_s}\right)$ |                              |              |                             |                 |                              |              |                             |                 |                              |              |                             |                 |
| $\rho = 0.0$                                                                                                                                               | 318                          | 0.003        | 604                         | 0.901           | 321                          | 0.002        | 612                         | 0.887           | 322                          | 0.001        | 613                         | 0.873           |
| $\rho = 0.2$                                                                                                                                               | 319                          | 0.003        | 600                         | 0.899           | 320                          | 0.003        | 608                         | 0.888           | 322                          | 0.002        | 612                         | 0.882           |
| $\rho = 0.4$                                                                                                                                               | 320                          | 0.002        | 600                         | 0.906           | 319                          | 0.003        | 609                         | 0.899           | 319                          | 0.002        | 612                         | 0.881           |
| $\rho = 0.6$                                                                                                                                               | 316                          | 0.003        | 600                         | 0.906           | 319                          | 0.003        | 604                         | 0.902           | 320                          | 0.002        | 607                         | 0.884           |
| $W_s = \left(\frac{n_s}{n_s}, \frac{n_s-1}{n_s}, \dots, \frac{1}{n_s}\right), V_s = \left(\frac{1}{n_s}, \frac{2}{n_s}, \dots, \frac{n_s}{n_s}\right)$     |                              |              |                             |                 |                              |              |                             |                 |                              |              |                             |                 |
| $\rho = 0.0$                                                                                                                                               | 315                          | 0.003        | 605                         | 0.905           | 321                          | 0.002        | 611                         | 0.889           | 324                          | 0.002        | 616                         | 0.872           |
| $\rho = 0.2$                                                                                                                                               | 317                          | 0.002        | 600                         | 0.897           | 321                          | 0.003        | 608                         | 0.888           | 323                          | 0.002        | 613                         | 0.876           |
| $\rho = 0.4$                                                                                                                                               | 319                          | 0.004        | 602                         | 0.907           | 325                          | 0.002        | 608                         | 0.896           | 322                          | 0.002        | 610                         | 0.879           |
| $\rho = 0.6$                                                                                                                                               | 316                          | 0.003        | 603                         | 0.906           | 319                          | 0.002        | 607                         | 0.896           | 324                          | 0.003        | 609                         | 0.882           |

<sup>1</sup>:  $ROC(0.1)_0 = 0.40$

<sup>2</sup>:  $ROC(0.1)_a = 0.65$

Table 2: Simulation results evaluating the impact of marker parameters  $n_s$ ,  $W_s$ ,  $V_s$  and  $\rho$  on the operating characteristics of our study when three stopping times are included in stage 2. Simulations were completed using  $P = 0.3$  and  $ROC(0.1)_{co} = 0.45$ . 10000 simulations were completed for each scenario.

|                                                                                                                                                            | $n_s = 3$                    |              |                             |                 | $n_s = 5$                    |              |                             |                 | $n_s = 7$                    |              |                             |                 |
|------------------------------------------------------------------------------------------------------------------------------------------------------------|------------------------------|--------------|-----------------------------|-----------------|------------------------------|--------------|-----------------------------|-----------------|------------------------------|--------------|-----------------------------|-----------------|
|                                                                                                                                                            | Null hypothesis <sup>1</sup> |              | Alt hypothesis <sup>2</sup> |                 | Null hypothesis <sup>1</sup> |              | Alt hypothesis <sup>2</sup> |                 | Null hypothesis <sup>1</sup> |              | Alt hypothesis <sup>2</sup> |                 |
|                                                                                                                                                            | E(SS)                        | Unc $\alpha$ | E(SS)                       | Unc $1 - \beta$ | E(SS)                        | Unc $\alpha$ | E(SS)                       | Unc $1 - \beta$ | E(SS)                        | Unc $\alpha$ | E(SS)                       | Unc $1 - \beta$ |
| $\rho = 0.0$                                                                                                                                               | 308                          | 0.002        | 564                         | 0.899           | 308                          | 0.002        | 572                         | 0.885           | 310                          | 0.002        | 577                         | 0.862           |
| $\rho = 0.2$                                                                                                                                               | 308                          | 0.004        | 560                         | 0.898           | 308                          | 0.003        | 568                         | 0.886           | 307                          | 0.002        | 573                         | 0.871           |
| $\rho = 0.4$                                                                                                                                               | 305                          | 0.004        | 560                         | 0.900           | 306                          | 0.003        | 565                         | 0.886           | 306                          | 0.003        | 574                         | 0.882           |
| $\rho = 0.6$                                                                                                                                               | 303                          | 0.004        | 561                         | 0.906           | 306                          | 0.003        | 563                         | 0.894           | 307                          | 0.003        | 570                         | 0.892           |
| $W_s = (1, \dots, 1), V_s = \left(\frac{n_s}{n_s}, \frac{n_s-1}{n_s}, \dots, \frac{1}{n_s}\right)$                                                         |                              |              |                             |                 |                              |              |                             |                 |                              |              |                             |                 |
| $\rho = 0.0$                                                                                                                                               | 309                          | 0.003        | 561                         | 0.907           | 307                          | 0.002        | 570                         | 0.878           | 310                          | 0.002        | 577                         | 0.869           |
| $\rho = 0.2$                                                                                                                                               | 304                          | 0.003        | 560                         | 0.899           | 307                          | 0.002        | 568                         | 0.886           | 308                          | 0.001        | 574                         | 0.871           |
| $\rho = 0.4$                                                                                                                                               | 306                          | 0.003        | 561                         | 0.903           | 307                          | 0.003        | 569                         | 0.892           | 304                          | 0.002        | 574                         | 0.874           |
| $\rho = 0.6$                                                                                                                                               | 301                          | 0.004        | 562                         | 0.903           | 305                          | 0.003        | 567                         | 0.894           | 307                          | 0.003        | 573                         | 0.872           |
| $W_s = \left(\frac{n_s}{n_s}, \frac{n_s-1}{n_s}, \dots, \frac{1}{n_s}\right), V_s = (1, \dots, 1)$                                                         |                              |              |                             |                 |                              |              |                             |                 |                              |              |                             |                 |
| $\rho = 0.0$                                                                                                                                               | 302                          | 0.002        | 560                         | 0.903           | 305                          | 0.002        | 572                         | 0.883           | 308                          | 0.002        | 577                         | 0.867           |
| $\rho = 0.2$                                                                                                                                               | 303                          | 0.002        | 561                         | 0.895           | 304                          | 0.003        | 567                         | 0.890           | 306                          | 0.002        | 570                         | 0.882           |
| $\rho = 0.4$                                                                                                                                               | 305                          | 0.004        | 561                         | 0.900           | 307                          | 0.003        | 565                         | 0.898           | 305                          | 0.003        | 569                         | 0.888           |
| $\rho = 0.6$                                                                                                                                               | 304                          | 0.003        | 557                         | 0.906           | 304                          | 0.002        | 560                         | 0.900           | 306                          | 0.002        | 566                         | 0.895           |
| $W_s = \left(\frac{n_s}{n_s}, \frac{n_s-1}{n_s}, \dots, \frac{1}{n_s}\right), V_s = \left(\frac{n_s}{n_s}, \frac{n_s-1}{n_s}, \dots, \frac{1}{n_s}\right)$ |                              |              |                             |                 |                              |              |                             |                 |                              |              |                             |                 |
| $\rho = 0.0$                                                                                                                                               | 304                          | 0.003        | 563                         | 0.898           | 305                          | 0.002        | 572                         | 0.881           | 306                          | 0.001        | 575                         | 0.866           |
| $\rho = 0.2$                                                                                                                                               | 303                          | 0.003        | 564                         | 0.899           | 307                          | 0.003        | 568                         | 0.884           | 308                          | 0.002        | 573                         | 0.876           |
| $\rho = 0.4$                                                                                                                                               | 300                          | 0.004        | 561                         | 0.898           | 305                          | 0.003        | 568                         | 0.892           | 306                          | 0.003        | 569                         | 0.888           |
| $\rho = 0.6$                                                                                                                                               | 302                          | 0.003        | 560                         | 0.900           | 305                          | 0.004        | 564                         | 0.899           | 302                          | 0.003        | 573                         | 0.885           |
| $W_s = \left(\frac{n_s}{n_s}, \frac{n_s-1}{n_s}, \dots, \frac{1}{n_s}\right), V_s = \left(\frac{1}{n_s}, \frac{2}{n_s}, \dots, \frac{n_s}{n_s}\right)$     |                              |              |                             |                 |                              |              |                             |                 |                              |              |                             |                 |
| $\rho = 0.0$                                                                                                                                               | 305                          | 0.003        | 563                         | 0.898           | 308                          | 0.003        | 570                         | 0.886           | 304                          | 0.001        | 575                         | 0.871           |
| $\rho = 0.2$                                                                                                                                               | 305                          | 0.003        | 561                         | 0.895           | 308                          | 0.004        | 567                         | 0.882           | 307                          | 0.002        | 572                         | 0.874           |
| $\rho = 0.4$                                                                                                                                               | 304                          | 0.003        | 561                         | 0.899           | 308                          | 0.003        | 567                         | 0.887           | 308                          | 0.002        | 571                         | 0.880           |
| $\rho = 0.6$                                                                                                                                               | 304                          | 0.004        | 561                         | 0.902           | 304                          | 0.003        | 566                         | 0.889           | 307                          | 0.002        | 569                         | 0.886           |

<sup>1</sup>:  $ROC(0.1)_0 = 0.40$

<sup>2</sup>:  $ROC(0.1)_a = 0.65$

Table 3: Simulation results evaluating the impact of marker parameters  $n_s$ ,  $W_s$ ,  $V_s$  and  $\rho$  on the operating characteristics of our study when four stopping times are included in stage 2. Simulations were completed using  $P = 0.3$  and  $ROC(0.1)_{co} = 0.45$ . 10000 simulations were completed for each scenario.

|                                                                                                                                                            | $n_s = 3$                    |              |                             |                 | $n_s = 5$                    |              |                             |                 | $n_s = 7$                    |              |                             |                 |
|------------------------------------------------------------------------------------------------------------------------------------------------------------|------------------------------|--------------|-----------------------------|-----------------|------------------------------|--------------|-----------------------------|-----------------|------------------------------|--------------|-----------------------------|-----------------|
|                                                                                                                                                            | Null hypothesis <sup>1</sup> |              | Alt hypothesis <sup>2</sup> |                 | Null hypothesis <sup>1</sup> |              | Alt hypothesis <sup>2</sup> |                 | Null hypothesis <sup>1</sup> |              | Alt hypothesis <sup>2</sup> |                 |
|                                                                                                                                                            | E(SS)                        | Unc $\alpha$ | E(SS)                       | Unc $1 - \beta$ | E(SS)                        | Unc $\alpha$ | E(SS)                       | Unc $1 - \beta$ | E(SS)                        | Unc $\alpha$ | E(SS)                       | Unc $1 - \beta$ |
| $W_s = (1, \dots, 1), V_s = (1, \dots, 1)$                                                                                                                 |                              |              |                             |                 |                              |              |                             |                 |                              |              |                             |                 |
| $\rho = 0.0$                                                                                                                                               | 299                          | 0.004        | 541                         | 0.898           | 302                          | 0.002        | 551                         | 0.878           | 302                          | 0.002        | 558                         | 0.862           |
| $\rho = 0.2$                                                                                                                                               | 298                          | 0.002        | 539                         | 0.897           | 298                          | 0.002        | 547                         | 0.890           | 300                          | 0.002        | 553                         | 0.870           |
| $\rho = 0.4$                                                                                                                                               | 297                          | 0.002        | 540                         | 0.895           | 298                          | 0.003        | 545                         | 0.889           | 301                          | 0.002        | 553                         | 0.878           |
| $\rho = 0.6$                                                                                                                                               | 296                          | 0.003        | 538                         | 0.906           | 298                          | 0.003        | 545                         | 0.893           | 300                          | 0.004        | 545                         | 0.890           |
| $W_s = (1, \dots, 1), V_s = \left(\frac{n_s}{n_s}, \frac{n_s-1}{n_s}, \dots, \frac{1}{n_s}\right)$                                                         |                              |              |                             |                 |                              |              |                             |                 |                              |              |                             |                 |
| $\rho = 0.0$                                                                                                                                               | 300                          | 0.003        | 546                         | 0.893           | 300                          | 0.003        | 550                         | 0.880           | 300                          | 0.002        | 556                         | 0.859           |
| $\rho = 0.2$                                                                                                                                               | 299                          | 0.004        | 540                         | 0.898           | 300                          | 0.003        | 548                         | 0.880           | 297                          | 0.002        | 556                         | 0.868           |
| $\rho = 0.4$                                                                                                                                               | 297                          | 0.005        | 540                         | 0.897           | 300                          | 0.003        | 545                         | 0.886           | 300                          | 0.002        | 551                         | 0.868           |
| $\rho = 0.6$                                                                                                                                               | 297                          | 0.004        | 539                         | 0.904           | 299                          | 0.003        | 547                         | 0.883           | 298                          | 0.004        | 552                         | 0.873           |
| $W_s = \left(\frac{n_s}{n_s}, \frac{n_s-1}{n_s}, \dots, \frac{1}{n_s}\right), V_s = (1, \dots, 1)$                                                         |                              |              |                             |                 |                              |              |                             |                 |                              |              |                             |                 |
| $\rho = 0.0$                                                                                                                                               | 298                          | 0.003        | 541                         | 0.894           | 299                          | 0.003        | 550                         | 0.880           | 299                          | 0.002        | 556                         | 0.862           |
| $\rho = 0.2$                                                                                                                                               | 298                          | 0.004        | 541                         | 0.899           | 299                          | 0.003        | 541                         | 0.884           | 299                          | 0.002        | 550                         | 0.871           |
| $\rho = 0.4$                                                                                                                                               | 294                          | 0.003        | 539                         | 0.904           | 300                          | 0.004        | 545                         | 0.892           | 301                          | 0.003        | 548                         | 0.885           |
| $\rho = 0.6$                                                                                                                                               | 297                          | 0.004        | 538                         | 0.901           | 296                          | 0.003        | 541                         | 0.898           | 300                          | 0.004        | 546                         | 0.892           |
| $W_s = \left(\frac{n_s}{n_s}, \frac{n_s-1}{n_s}, \dots, \frac{1}{n_s}\right), V_s = \left(\frac{n_s}{n_s}, \frac{n_s-1}{n_s}, \dots, \frac{1}{n_s}\right)$ |                              |              |                             |                 |                              |              |                             |                 |                              |              |                             |                 |
| $\rho = 0.0$                                                                                                                                               | 299                          | 0.004        | 543                         | 0.893           | 298                          | 0.003        | 550                         | 0.876           | 300                          | 0.003        | 555                         | 0.862           |
| $\rho = 0.2$                                                                                                                                               | 297                          | 0.002        | 540                         | 0.894           | 296                          | 0.002        | 549                         | 0.887           | 297                          | 0.003        | 553                         | 0.876           |
| $\rho = 0.4$                                                                                                                                               | 297                          | 0.003        | 540                         | 0.897           | 295                          | 0.003        | 545                         | 0.887           | 297                          | 0.003        | 551                         | 0.876           |
| $\rho = 0.6$                                                                                                                                               | 298                          | 0.002        | 539                         | 0.896           | 297                          | 0.002        | 544                         | 0.890           | 296                          | 0.003        | 548                         | 0.884           |
| $W_s = \left(\frac{n_s}{n_s}, \frac{n_s-1}{n_s}, \dots, \frac{1}{n_s}\right), V_s = \left(\frac{1}{n_s}, \frac{2}{n_s}, \dots, \frac{n_s}{n_s}\right)$     |                              |              |                             |                 |                              |              |                             |                 |                              |              |                             |                 |
| $\rho = 0.0$                                                                                                                                               | 294                          | 0.002        | 545                         | 0.891           | 298                          | 0.003        | 550                         | 0.877           | 299                          | 0.002        | 555                         | 0.865           |
| $\rho = 0.2$                                                                                                                                               | 296                          | 0.004        | 542                         | 0.895           | 300                          | 0.001        | 547                         | 0.876           | 299                          | 0.002        | 552                         | 0.870           |
| $\rho = 0.4$                                                                                                                                               | 297                          | 0.005        | 542                         | 0.894           | 299                          | 0.003        | 547                         | 0.888           | 299                          | 0.002        | 551                         | 0.878           |
| $\rho = 0.6$                                                                                                                                               | 296                          | 0.004        | 540                         | 0.900           | 299                          | 0.003        | 546                         | 0.887           | 299                          | 0.002        | 548                         | 0.882           |

<sup>1</sup>:  $ROC(0.1)_0 = 0.40$

<sup>2</sup>:  $ROC(0.1)_a = 0.65$
